# Supplementary material for: Development of a self-contained microfluidic chip and an internet-of-things-based point-of-care device for automated identification of respiratory viruses
Source: Royal Society of Chemistry journal article supplement (doi:10.1039/d3lc00933e), 2024-01-01
Supplement: d3lc00933e1.pdf [file d3lc00933e1.pdf]

**Development of a self-contained microfluidic chip and an internet-of-things-based point-of-care device for automated identification of respiratory viruses**

Quoc Huynh Nguyen<sup>1</sup>, Van Dan Nguyen<sup>1</sup>, Vu Minh Phan, Tae Seok Seo\*

Department of Chemical Engineering (BK21 FOUR Integrated Engineering Program), Kyung Hee University, Yongin, 17104, South Korea

\*Corresponding author

E-mail address: seots@khu.ac.kr; Phone: +82-31-201-3676; Fax: +82-31-204-8114

**Table S1. Primer sequences for amplifying the target gene of SARS-CoV-2, Influenza A, Influenza B and human 18S rRNA gene.**

| <b>Primer names</b> | <b>Sequence (5'→ 3')</b>                                | <b>Final concentration</b> |
|---------------------|---------------------------------------------------------|----------------------------|
| CoV2-As1e-F3        | CGGTGGACAAATTGTCAC                                      | 0.2 µM                     |
| CoV2-As1e-B3        | CTTCTCTGGATTAAACACACTT                                  | 0.2 µM                     |
| CoV2-As1e-FIP       | TCAGCACACAAAGCCAAAAATTTATTTTTC<br>TGTGCAAAGGAAATTAAGGAG | 1.6 µM                     |
| CoV2-As1e-BIP       | TATTGGTGGAGCTAAACTTAAAGCCTTTTCT<br>GTACAATCCCTTTGAGTG   | 1.6 µM                     |
| CoV2-As1e-LF        | TTACAAGCTTAAAGAATGTCTGAACACT                            | 0.4 µM                     |
| CoV2-As1e-LB        | TTGAATTTAGGTGAAACATTTGTCACG                             | 0.4 µM                     |
| Influenza A-F3      | AGATGTTGTGGCAATGACT                                     | 0.2 µM                     |
| Influenza A-B3      | AAGACCAATCTACAGTATCACT                                  | 0.2 µM                     |
| Influenza A-FIP     | CGGCCTCATAAGTCTAGCC-<br>GTCAGGGTATAGCGGAAG              | 1.6 µM                     |
| Influenza A-BIP     | TGCTTCTGGGTGAATTAATCAGG-<br>ACGCCACAAAAAGAAATGC         | 1.6 µM                     |
| Influenza A-LF      | CAGCTCAGGATGTTGAACGAAA                                  | 0.8 µM                     |
| Influenza A-LB      | AGAAAAACAATCTGGACTAGTGCG                                | 0.8 µM                     |
| Influenza-B-F3      | GGACATGAACAACAAAGATGC                                   | 0.2 µM                     |
| Influenza-B -B3     | GGCAACAAGTTTAGCAACAA                                    | 0.2 µM                     |
| Influenza-B -FIP    | GGACAATACATTACGCATATCCCTTGATAA<br>AGGAGGAAGTAAACACTCA   | 1.6 µM                     |
| Influenza-B-BIP     | GGAACATTCCTCAAACACCCCAGCCTTCCA<br>CTCTGGTCAT            | 1.6 µM                     |
| Influenza-B-LF      | GTCAAACGGAAGTCCCTTCTTTC                                 | 0.8 µM                     |
| Influenza-B-LB      | GATACAAGTCCTTATCAACTCTGCA                               | 0.8 µM                     |
| Human-18S-FIP       | TTCGTCACTACCTCCCCGGG-<br>CTACCACATCCAAGGAAGGC           | 0.2 µM                     |
| Human-18S-BIP       | ACAGGACTCTTTCGAGGCCCT-<br>TGCCCTCCAATGGATCCTC           | 0.2 µM                     |
| Human-18S-F3        | AGGGTTCGATTCCGGAGAG                                     | 1.6 µM                     |
| Human-18S-B3        | GAATTACCGCGGCTGCTG                                      | 1.6 µM                     |
| Human-18S-LF        | GTGGGTAATTTGCGCGCCTG                                    | 0.4 µM                     |
| Human-18S-LB        | ATTGGAATGAGTCCACTTT                                     | 0.4 µM                     |
